# Supplementary material for: Reanalysis of a 10-year record (2004–2013) of seasonal mass balances at Langenferner/Vedretta Lunga, Ortler Alps, Italy
Source: Copernicus journal article supplement (doi:10.5194/tc-11-1417-2017), 2017-06-22
Supplement: Supplementary file 1 [file tc-11-1417-2017-supplement.zip]

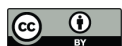

*Supplement of*

**Reanalysis of a 10-year record (2004–2013) of seasonal mass balances at  
Langenferner/Vedretta Lunga, Ortler Alps, Italy**

**Stephan Peter Galos et al.**

*Correspondence to:* Stephan Peter Galos ([stephan.galos@uibk.ac.at](mailto:stephan.galos@uibk.ac.at))

- [tc-11-1417-2017-supplement-title-page.pdf](#)
- [Supplement 1.pdf](#)
- [Supplement 2.ods](#)

The copyright of individual parts of the supplement might differ from the CC BY 3.0 License.
